# Supplementary material
Source: PubMed Central journal article supplement (PMC1783450)
Supplement: 7601511s1.pdf [file 7601511s1.pdf]

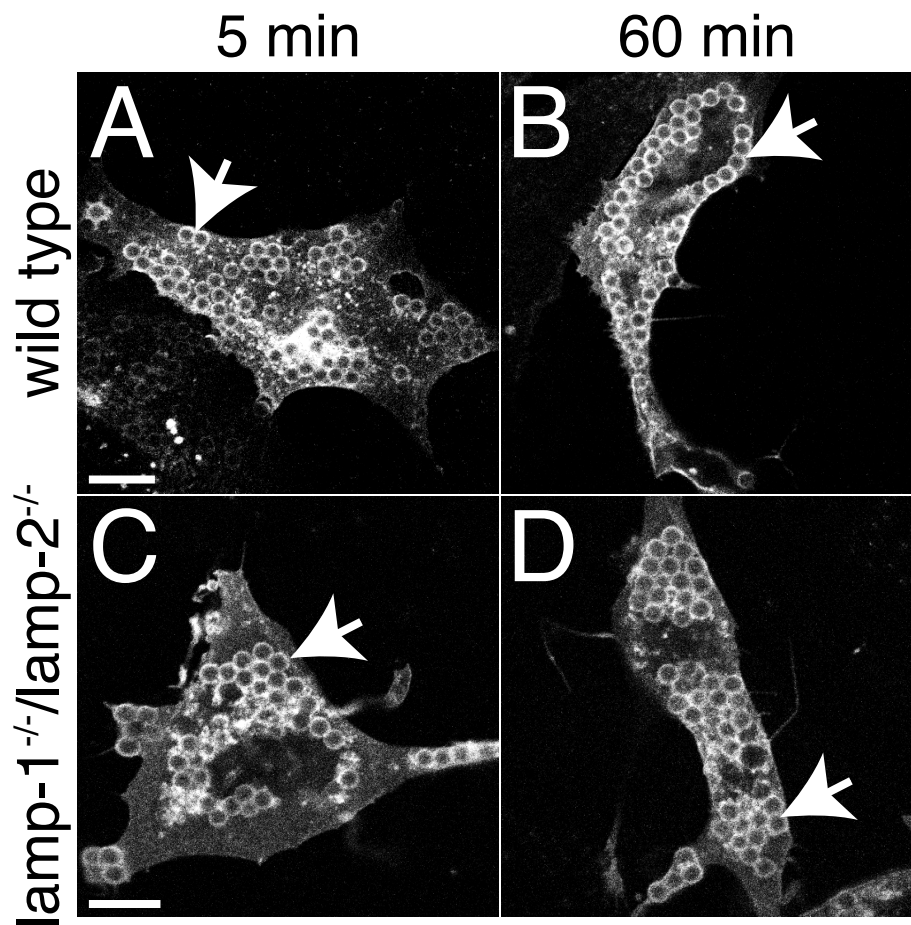

**Supplementary Figure 1.** Acquisition of TC10 in wildtype and *lamp-1<sup>-/-</sup>/lamp-2<sup>-/-</sup>* phagosomes. Wildtype (A-B) and *lamp-1<sup>-/-</sup>/lamp-2<sup>-/-</sup>* (C-D) fibroblasts were co-transfected with cDNA encoding FcγIIA receptors and GFP-TC10 (A-D) and after 24 h were exposed to IgG-opsonized beads. Phagosome maturation was allowed to proceed for 5 min (A, C) or 60 min (B, D). Closed arrows point to phagosomes positive for TC10. Size bar represents 10 μm.
