# Supplementary material
Source: PubMed Central journal article supplement (PMC1783450)
Supplement: 7601511s2.pdf [file 7601511s2.pdf]

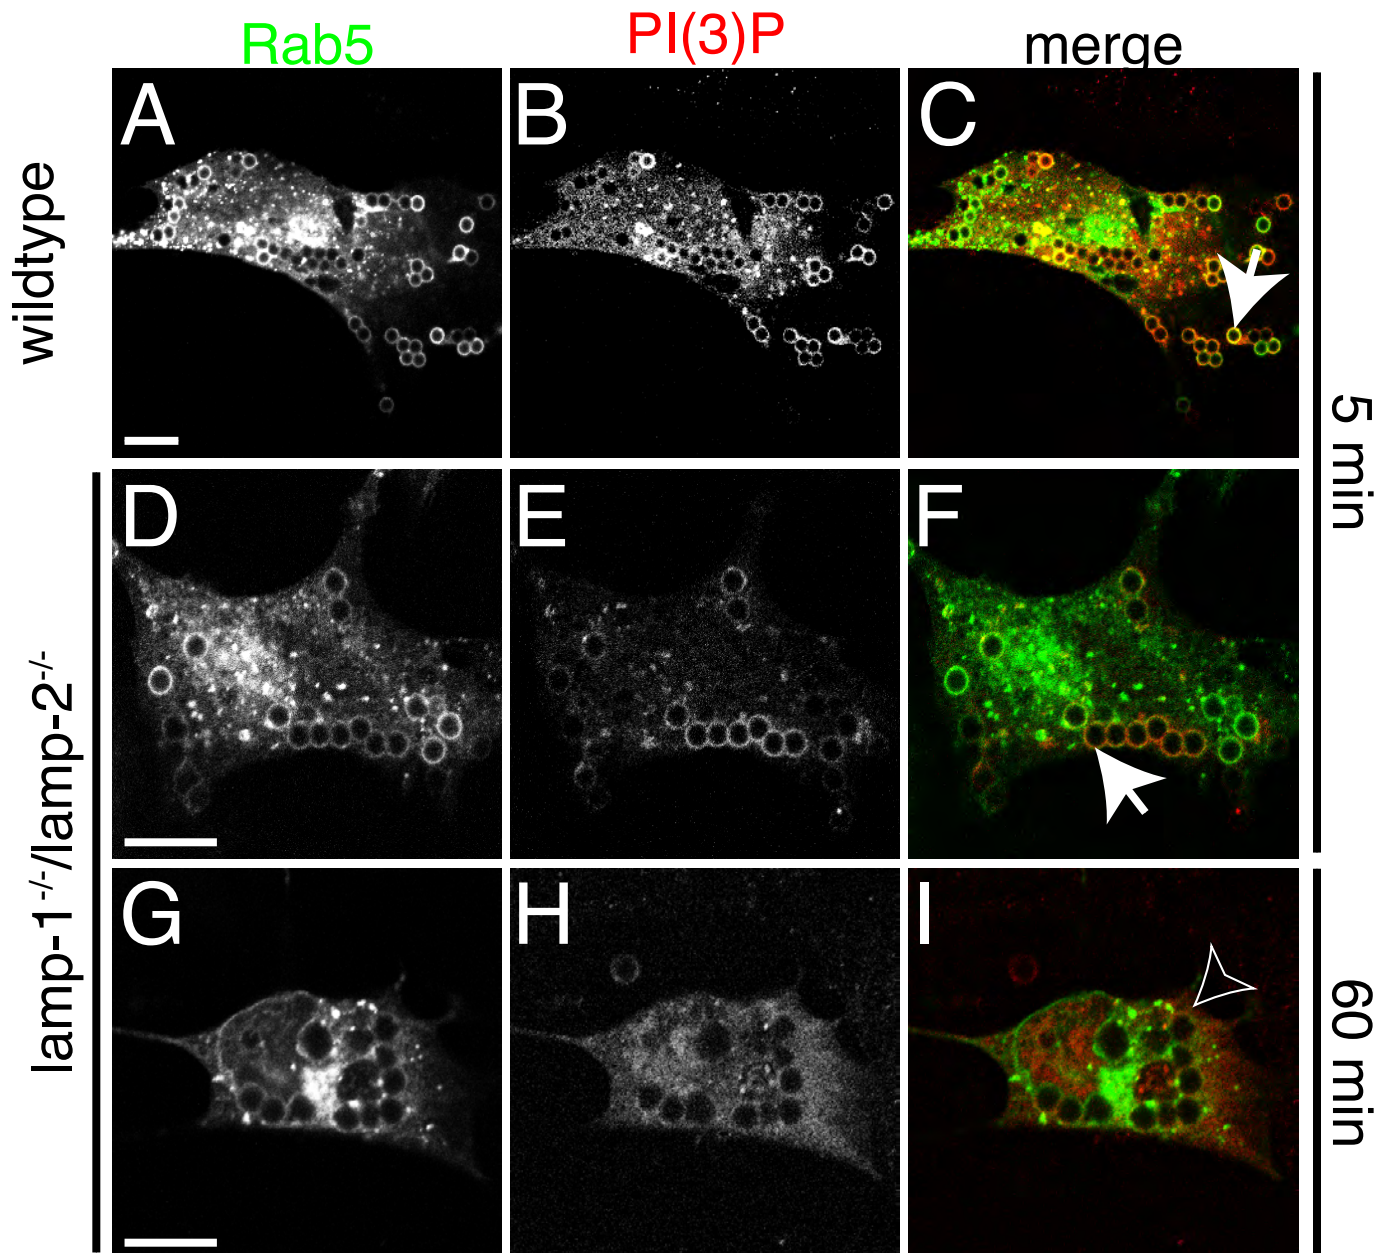

**Supplementary Figure 2.** Acquisition of early endocytic markers in wildtype and *lamp-1<sup>-/-</sup>/lamp-2<sup>-/-</sup>* phagosomes. Wildtype (A-C) and *lamp-1<sup>-/-</sup>/lamp-2<sup>-/-</sup>* fibroblasts (D-I) were co-transfected with cDNA encoding FcγIIA receptors (A-I) and after 24 h were exposed to IgG-opsonized beads. Phagosome maturation was allowed to proceed for 5 min (A-F) or 60 min (G-I) in WT and *lamp1<sup>-/-</sup>/lamp2<sup>-/-</sup>* fibroblasts co-expressing GFP-Rab5 (A,D,G, respectively) and GFP-PX (B,E,H, respectively). Overlays of green and red fluorescence are shown in C, F, and I. Closed arrows point to phagosomes positive for the indicated markers and open arrows to phagosomes that are negative for the markers. Size bar represents 10 μm.
