# Supplementary material
Source: PubMed Central journal article supplement (PMC1783450)
Supplement: 7601511s3.pdf [file 7601511s3.pdf]

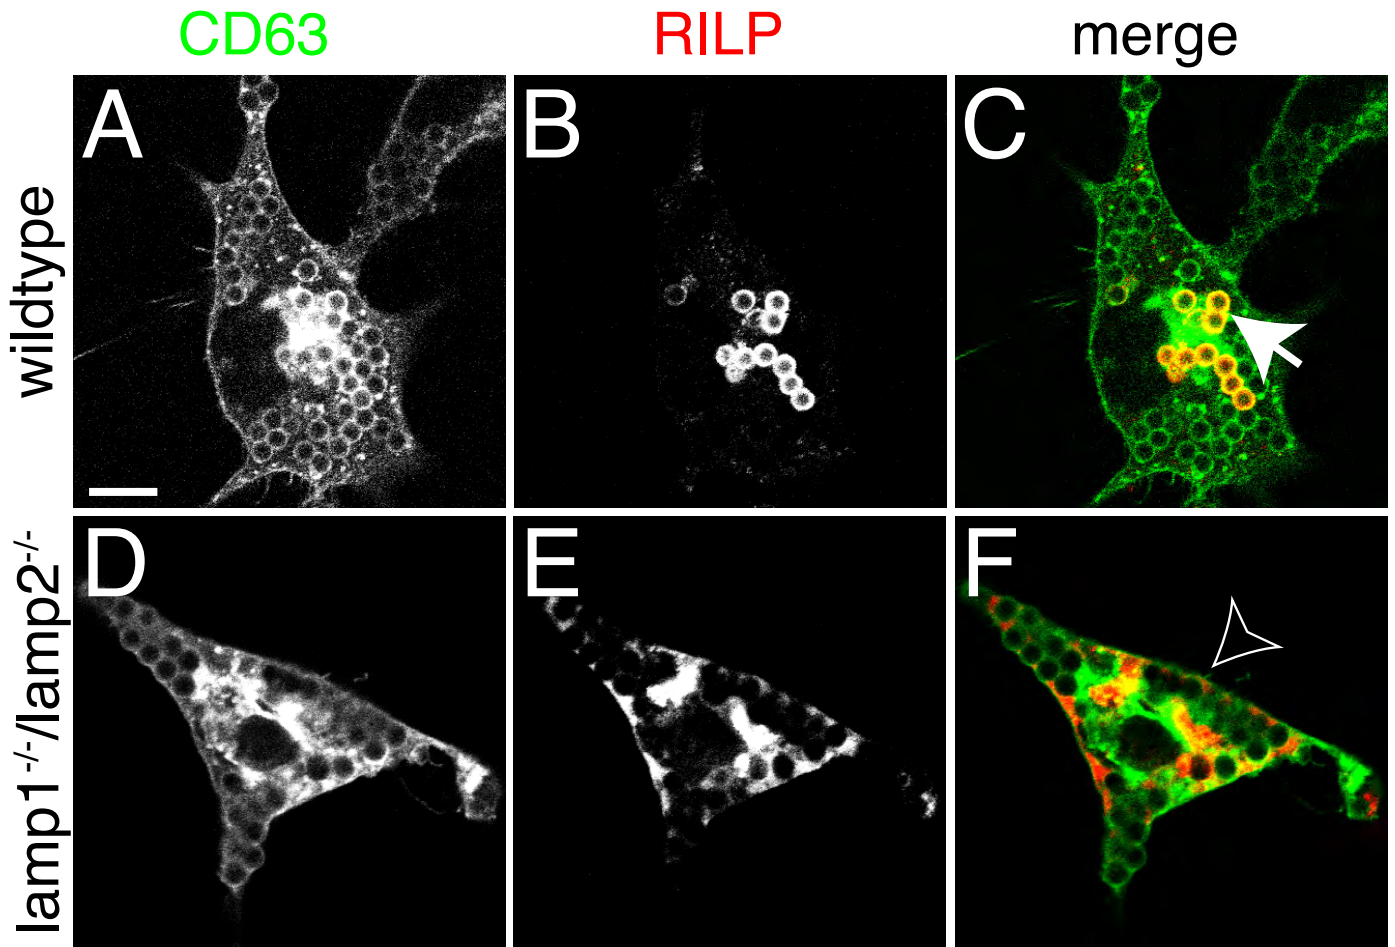

**Supplementary Figure 3.** *Acquisition of late endocytic markers in wildtype and  $lamp1^{-/-}/lamp2^{-/-}$  phagosomes.* Wildtype (A-C) and  $lamp1^{-/-}/lamp2^{-/-}$  (D-F) fibroblasts were transfected with cDNA encoding FcγIIA receptors and after 24 h were exposed to IgG-opsonized beads. Phagosome maturation was allowed to proceed for 60 min in WT and  $lamp1^{-/-}/lamp2^{-/-}$  fibroblasts co-expressing GFP-CD63 (A,D, respectively) and HA-RILP (B,E). Merged images of green and red fluorescence are shown in C and F. Closed arrows point to phagosomes positive for the indicated markers and open arrows to phagosomes that are negative for the markers. Size bar represents 10 μm.
