# Supplementary material
Source: PubMed Central journal article supplement (PMC1783450)
Supplement: 7601511s4.pdf [file 7601511s4.pdf]

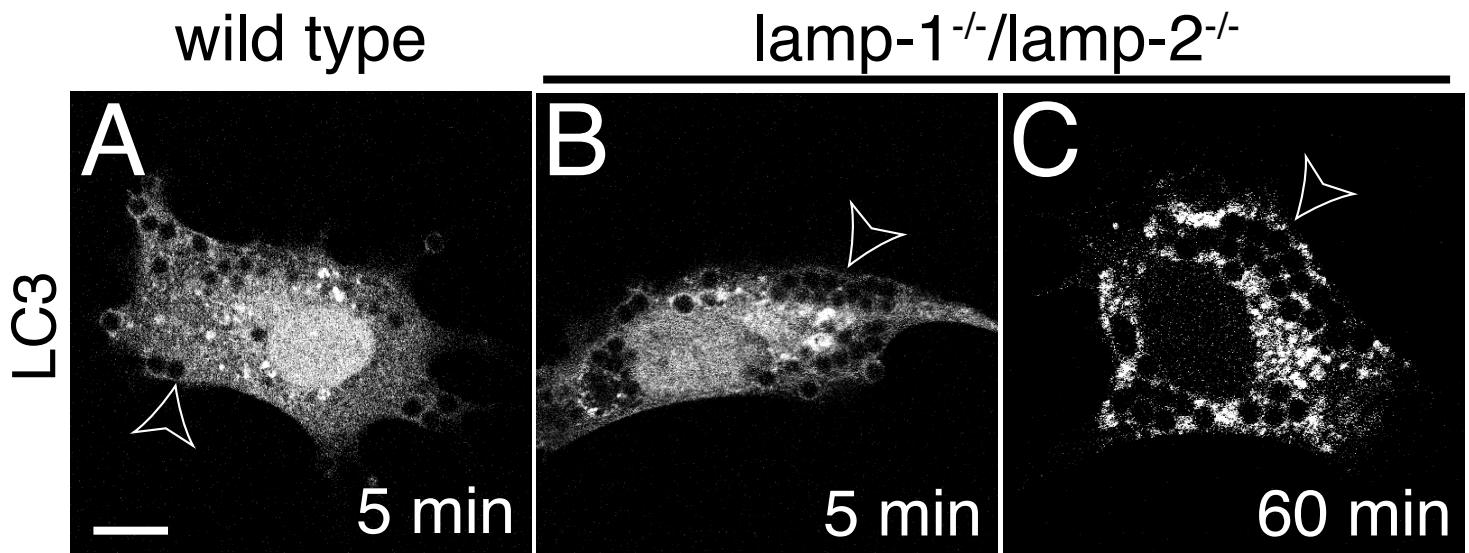

**Supplementary Figure 4.** *Distribution of LC3 in wildtype and lamp1<sup>-/-</sup>/lamp2<sup>-/-</sup> cells following phagocytosis.* Wildtype (A) and lamp1<sup>-/-</sup>/lamp2<sup>-/-</sup> (B-C) fibroblasts were co-transfected with cDNA encoding FcγIIA receptors and GFP-LC3. After 24 h, transfected cells were exposed to IgG-opsonized beads and maturation was allowed to proceed for 5 min (A-B) or 60 min (C). Open arrows point to phagosomes negative for LC3 at the indicated time. Size bar represents 10 μm.
