# Supplementary material
Source: PubMed Central journal article supplement (PMC1783450)
Supplement: 7601511s6.pdf [file 7601511s6.pdf]

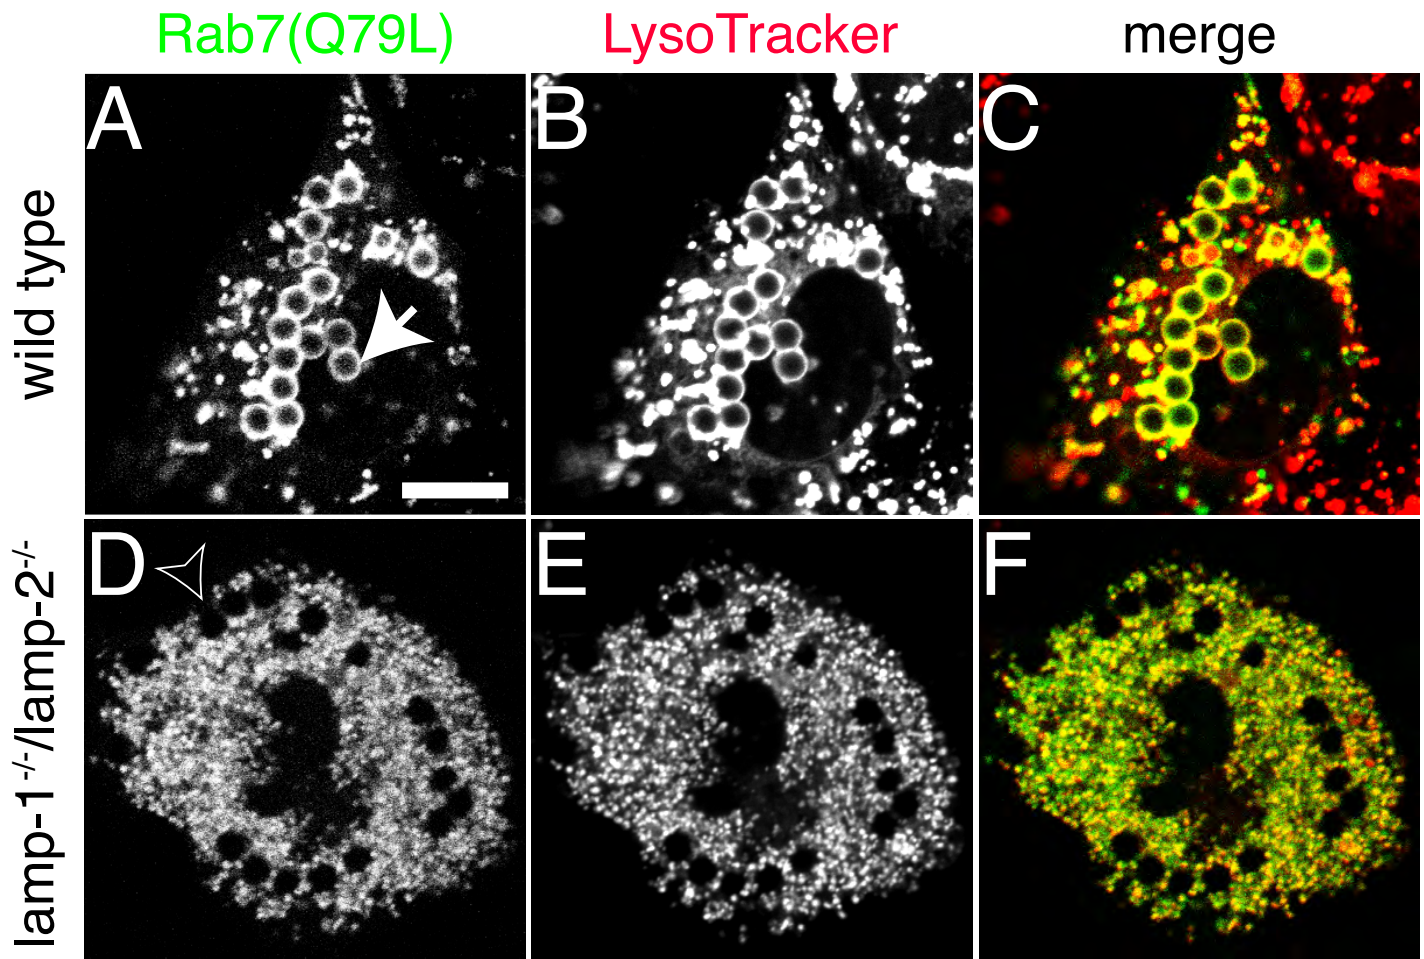

**Supplementary Figure 6.** *Effect of expression of Rab7(Q67L) on phagosome maturation.* Wildtype (**A-C**) and *lamp-1<sup>-/-</sup>/lamp-2<sup>-/-</sup>* fibroblasts (**D-F**) were transfected with plasmids encoding *myc*-tagged FcγIIA receptors and Rab7(Q67L). After 24 h, the cells were exposed to IgG-opsonized beads, phagosome maturation was allowed to proceed for 60 min and finally late endosomes/lysosomes were labeled with LysoTracker. Images were acquired by confocal microscopy and the fluorescence of Rab7(Q67L) is shown in **A** and **D**, LysoTracker in **B** and **E** and the merged images in **C** and **F**. Closed arrows represent phagosomes that were enriched in Rab7(Q67L) and open arrows represent phagosomes that were devoid of this marker. Images are representative of at least three separate experiments. Size bar represents 10 μm.
