# Supplementary material
Source: PubMed Central journal article supplement (PMC1783450)
Supplement: 7601511s8.pdf [file 7601511s8.pdf]

wild type

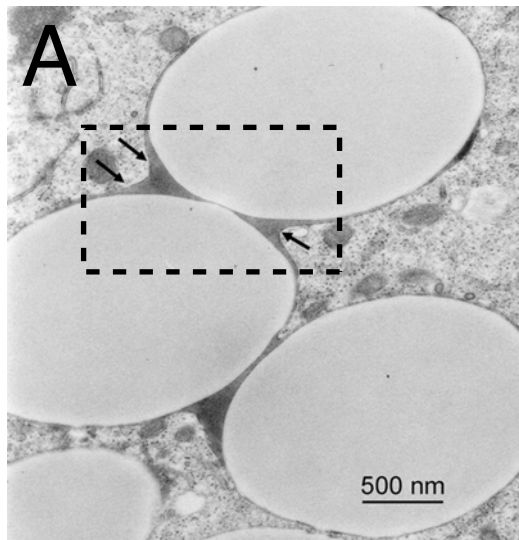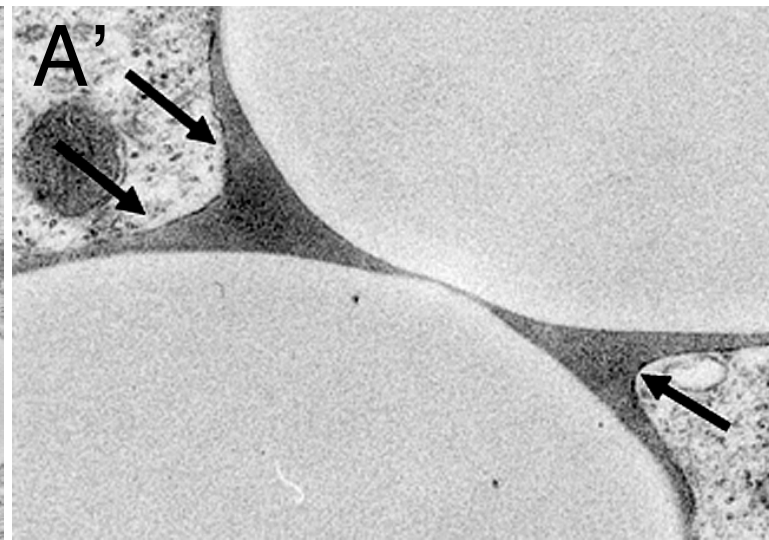

*lamp-1*<sup>-/-</sup>/*lamp-2*<sup>-/-</sup>

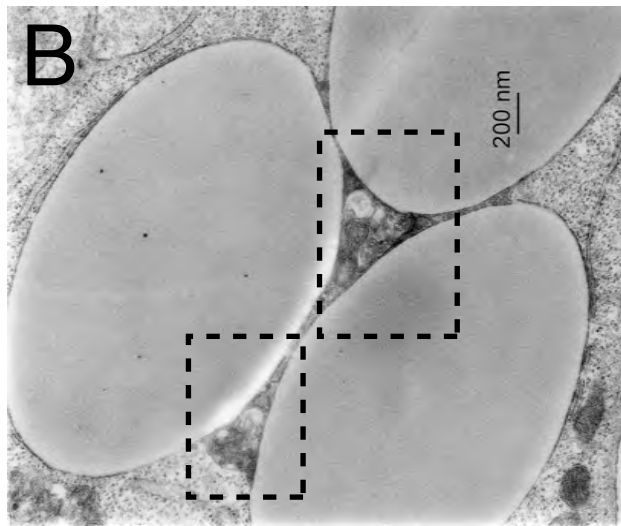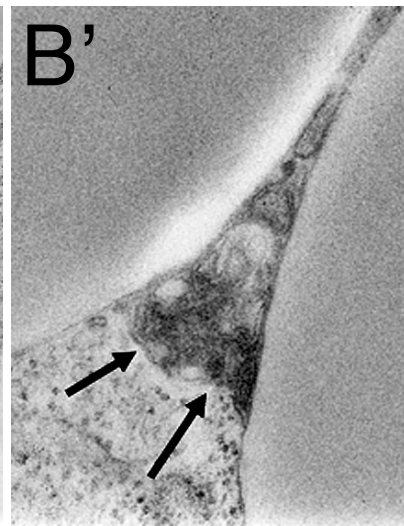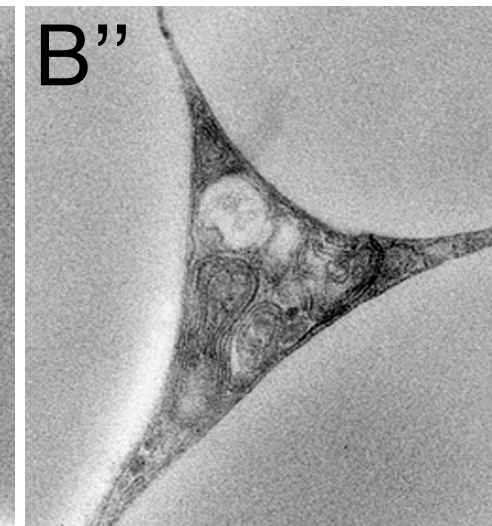

**Supplementary Figure 8.** *Electron micrographs of wildtype and *lamp-1*<sup>-/-</sup>/*lamp-2*<sup>-/-</sup> phagosomes.* Wildtype (A-A') and *lamp-1*<sup>-/-</sup>/*lamp-2*<sup>-/-</sup> cells transfected with cDNA encoding FcRs were exposed to IgG-opsonized latex beads for 15 min and allowed to mature for 45 min at 37°C. Cells were immediately fixed and processed for electron microscopy. Dashed boxes were enlarged and are shown in panels A', B' and B''.
