# Supplementary material
Source: PubMed Central journal article supplement (PMC1783450)
Supplement: 7601511s9.pdf [file 7601511s9.pdf]

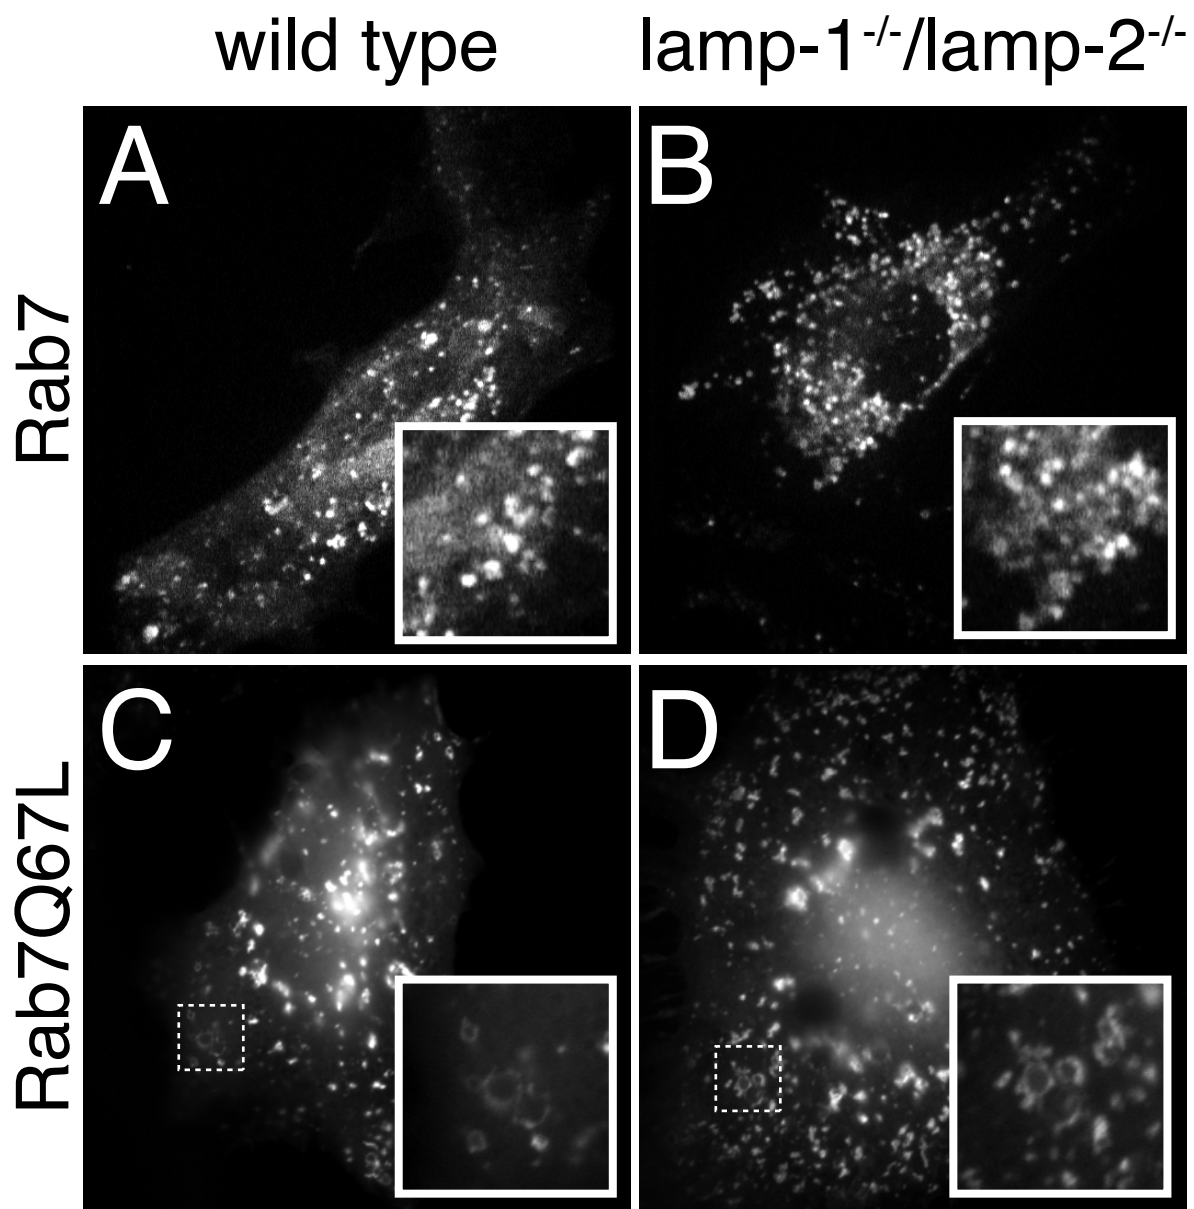

**Supplementary Figure 9 .** *Localization of Rab7(Q67L) in wildtype and lamp-1<sup>-/-</sup>/lamp-2<sup>-/-</sup> fibroblasts.* Wildtype (**A, C**) and *lamp-1<sup>-/-</sup>/lamp-2<sup>-/-</sup>* (**B, D**) were transfected with cDNA encoding GFP-Rab7 (**A-B**) or GFP-Rab7(Q67L) (**C-D**). After 24 h, images of the fluorescence of GFP were acquired. Insets represent enlarged portions of the cell.
