# Supplementary material
Source: PubMed Central journal article supplement (PMC1783450)
Supplement: 7601511s11.pdf [file 7601511s11.pdf]

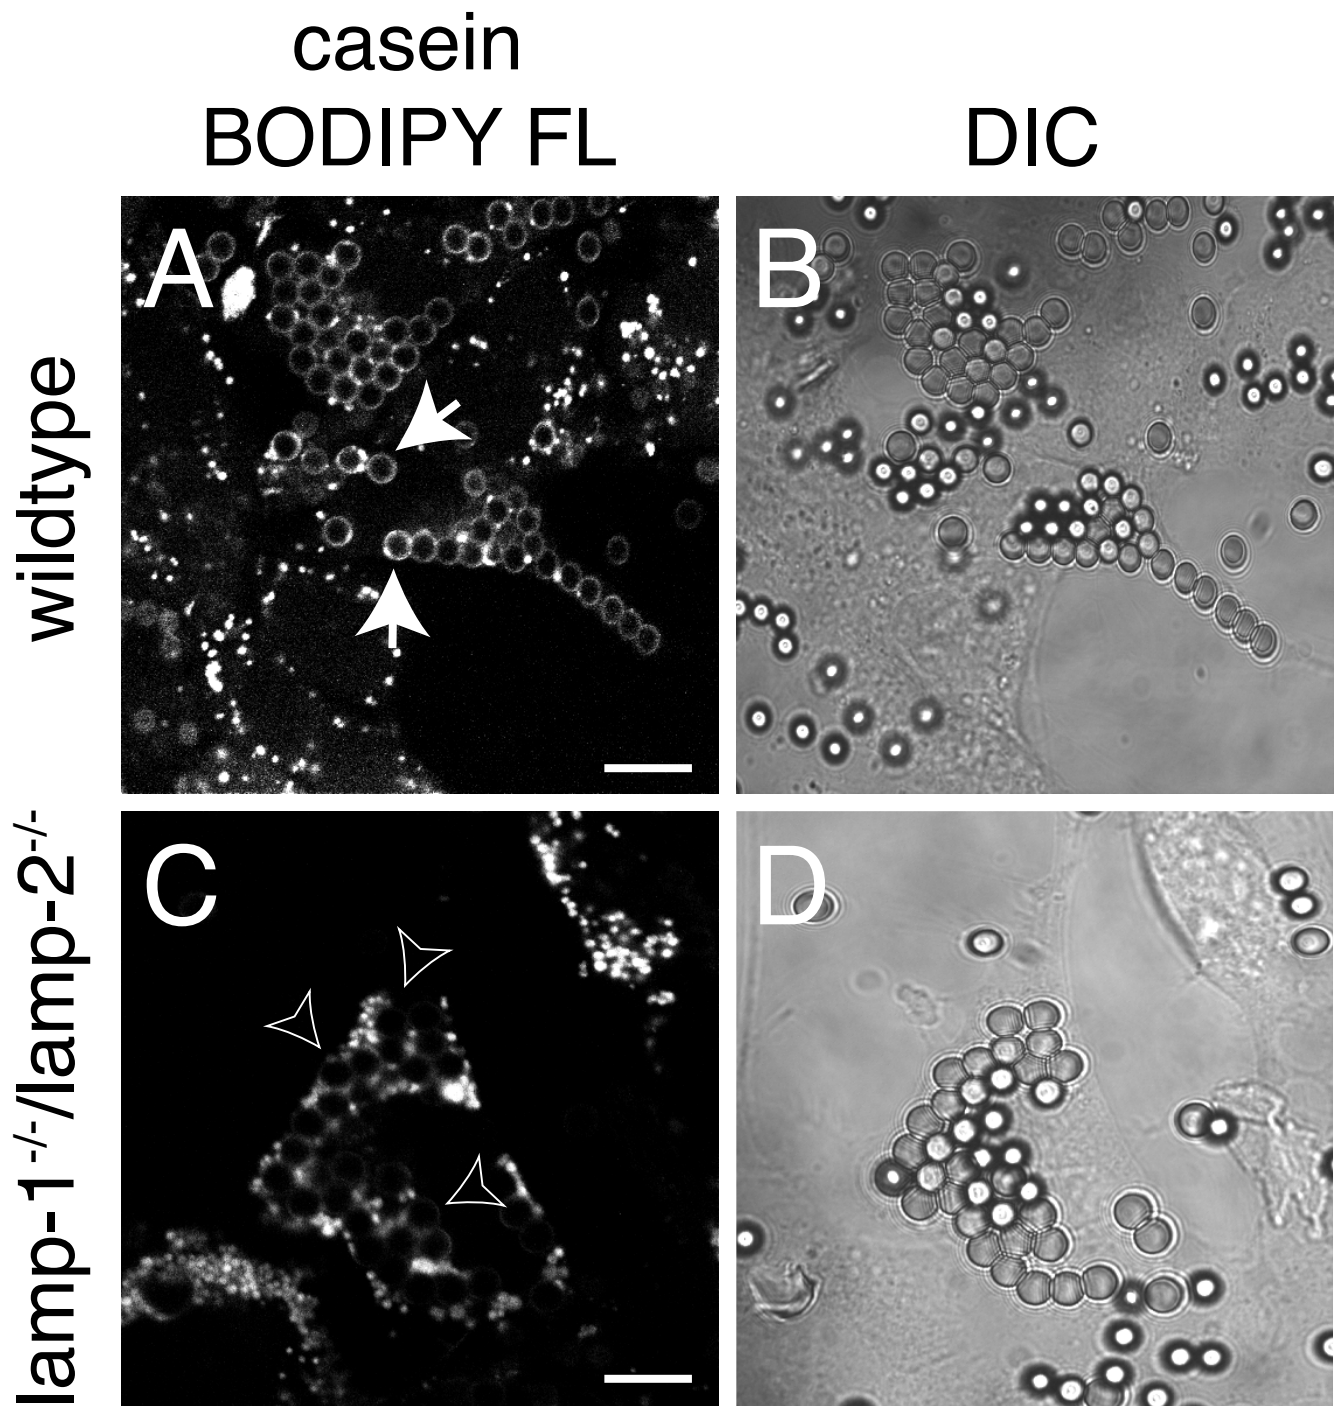

**Supplementary Figure 11 .** *Determination protease activity in wildtype and lamp-1<sup>-/-</sup>/lamp-2<sup>-/-</sup> fibroblasts.* Wildtype (A-B) and lamp-1<sup>-/-</sup>/lamp-2<sup>-/-</sup> cells (C-D) were transfected with cDNA encoding FcRs and were pulsed with 40 μg/ml of casein BODIPY-FL overnight followed by 1h of dye-free chase. Both cell types were exposed to IgG-opsonized latex beads for 15min and allowed to mature for 45 min at 37°C. Appearance of fluorescent signal indicates presence of proteolytic activity. Closed arrows represent phagosomes positive for protease activity; open arrows represent phagosomes negative for protease activity. Size bar = 10 μm
